# Supplementary material for: ITPR1 Protects Renal Cancer Cells against Natural Killer Cells by Inducing Autophagy
Source: Oxford University Press journal article supplement (doi:10.1158/0008-5472.can-14-0303), 2014-10-09
Supplement: 00085472can140303-sup-126496_2_supp_2612098_n88zsd.doc [file 00085472can140303-sup-126496_2_supp_2612098_n88zsd.doc]

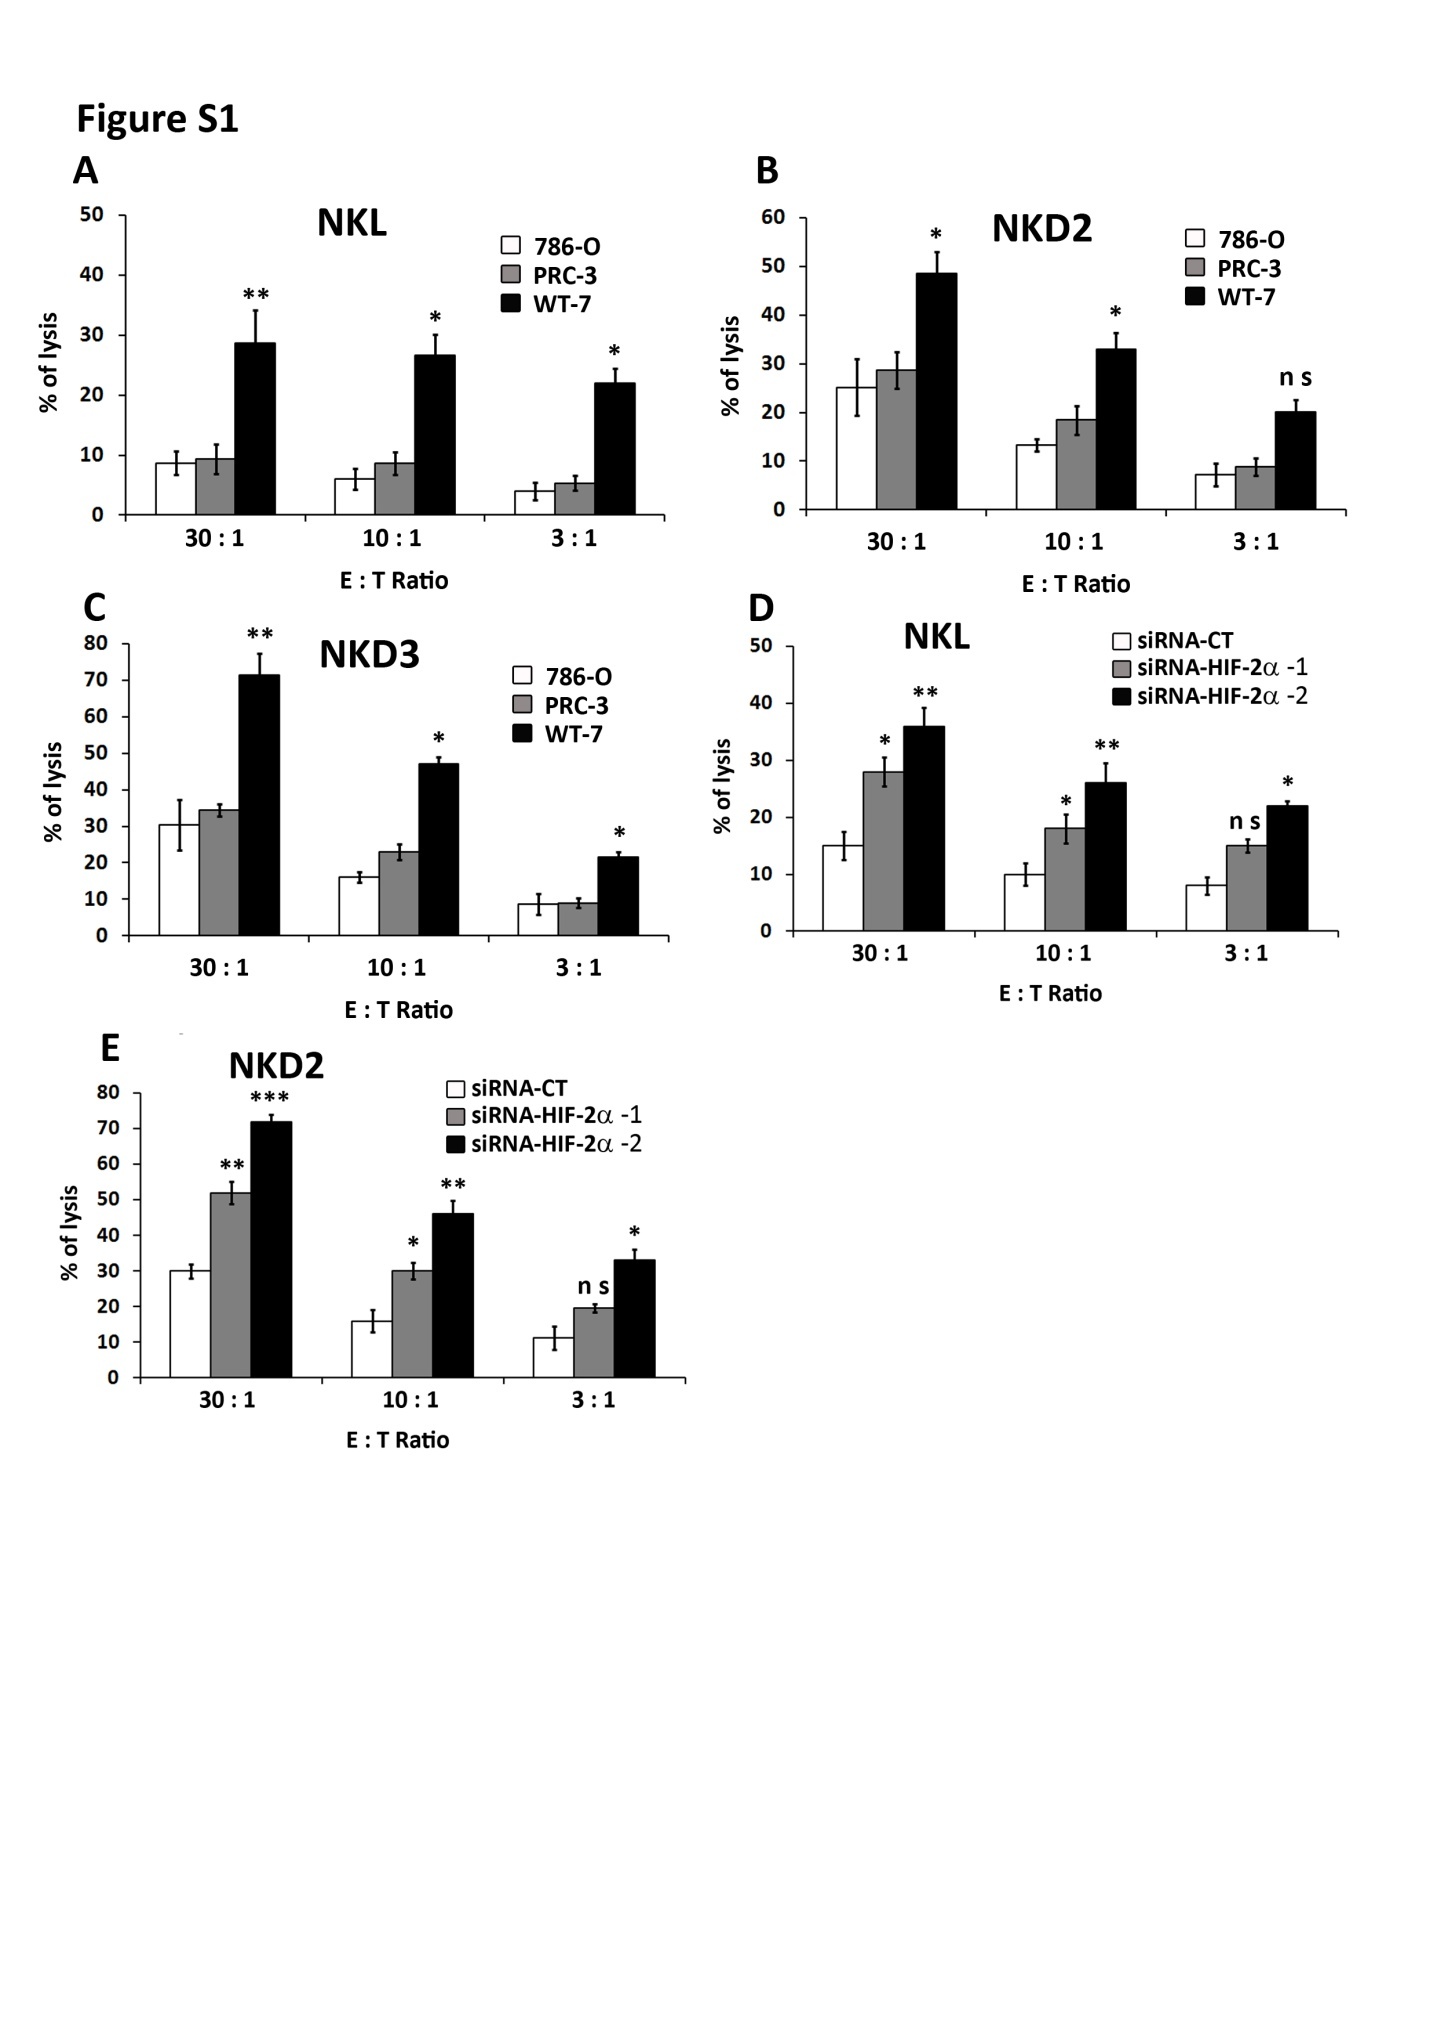
**Supplementary data**

**Figure S1.** **Differential susceptibility of 786-0, PRC3, and WT7 cell lines to NK-mediated lysis.**

**(A, B and C)** Cr51 cytotoxicity assays were performed on 786-0, PRC3, and WT7 cells as targets at different E: T ratios. NK cell line (NKL) and NKD were used as effectors. **(D and E)** Cr51 cytotoxicity assays were performed on 786-0 transfected with either siRNA against HIF-2α or siRNA-CT as targets at different E: T ratios. NK cell line (NKL) and NKD were used as effectors. Data represent 3 independent experiments with SD. Statistically significant difference (indicated by asterisks) are shown (*P < 0.05; **P < 0.005; and ***P < 0.0005).

**Figure S1.** **Differential susceptibility of 786-0, PRC3, and WT7 cell lines to NK-mediated lysis.**

**(A, B and C)** Cr51 cytotoxicity assays were performed on 786-0, PRC3, and WT7 cells as targets at different E: T ratios. NK cell line (NKL) and NKD were used as effectors. **(D and E)** Cr51 cytotoxicity assays were performed on 786-0 transfected with either siRNA against HIF-2α or siRNA-CT as targets at different E: T ratios. NK cell line (NKL) and NKD were used as effectors. Data represent 3 independent experiments with SD. Statistically significant difference (indicated by asterisks) are shown (*P < 0.05; **P < 0.005; and ***P < 0.0005).

**
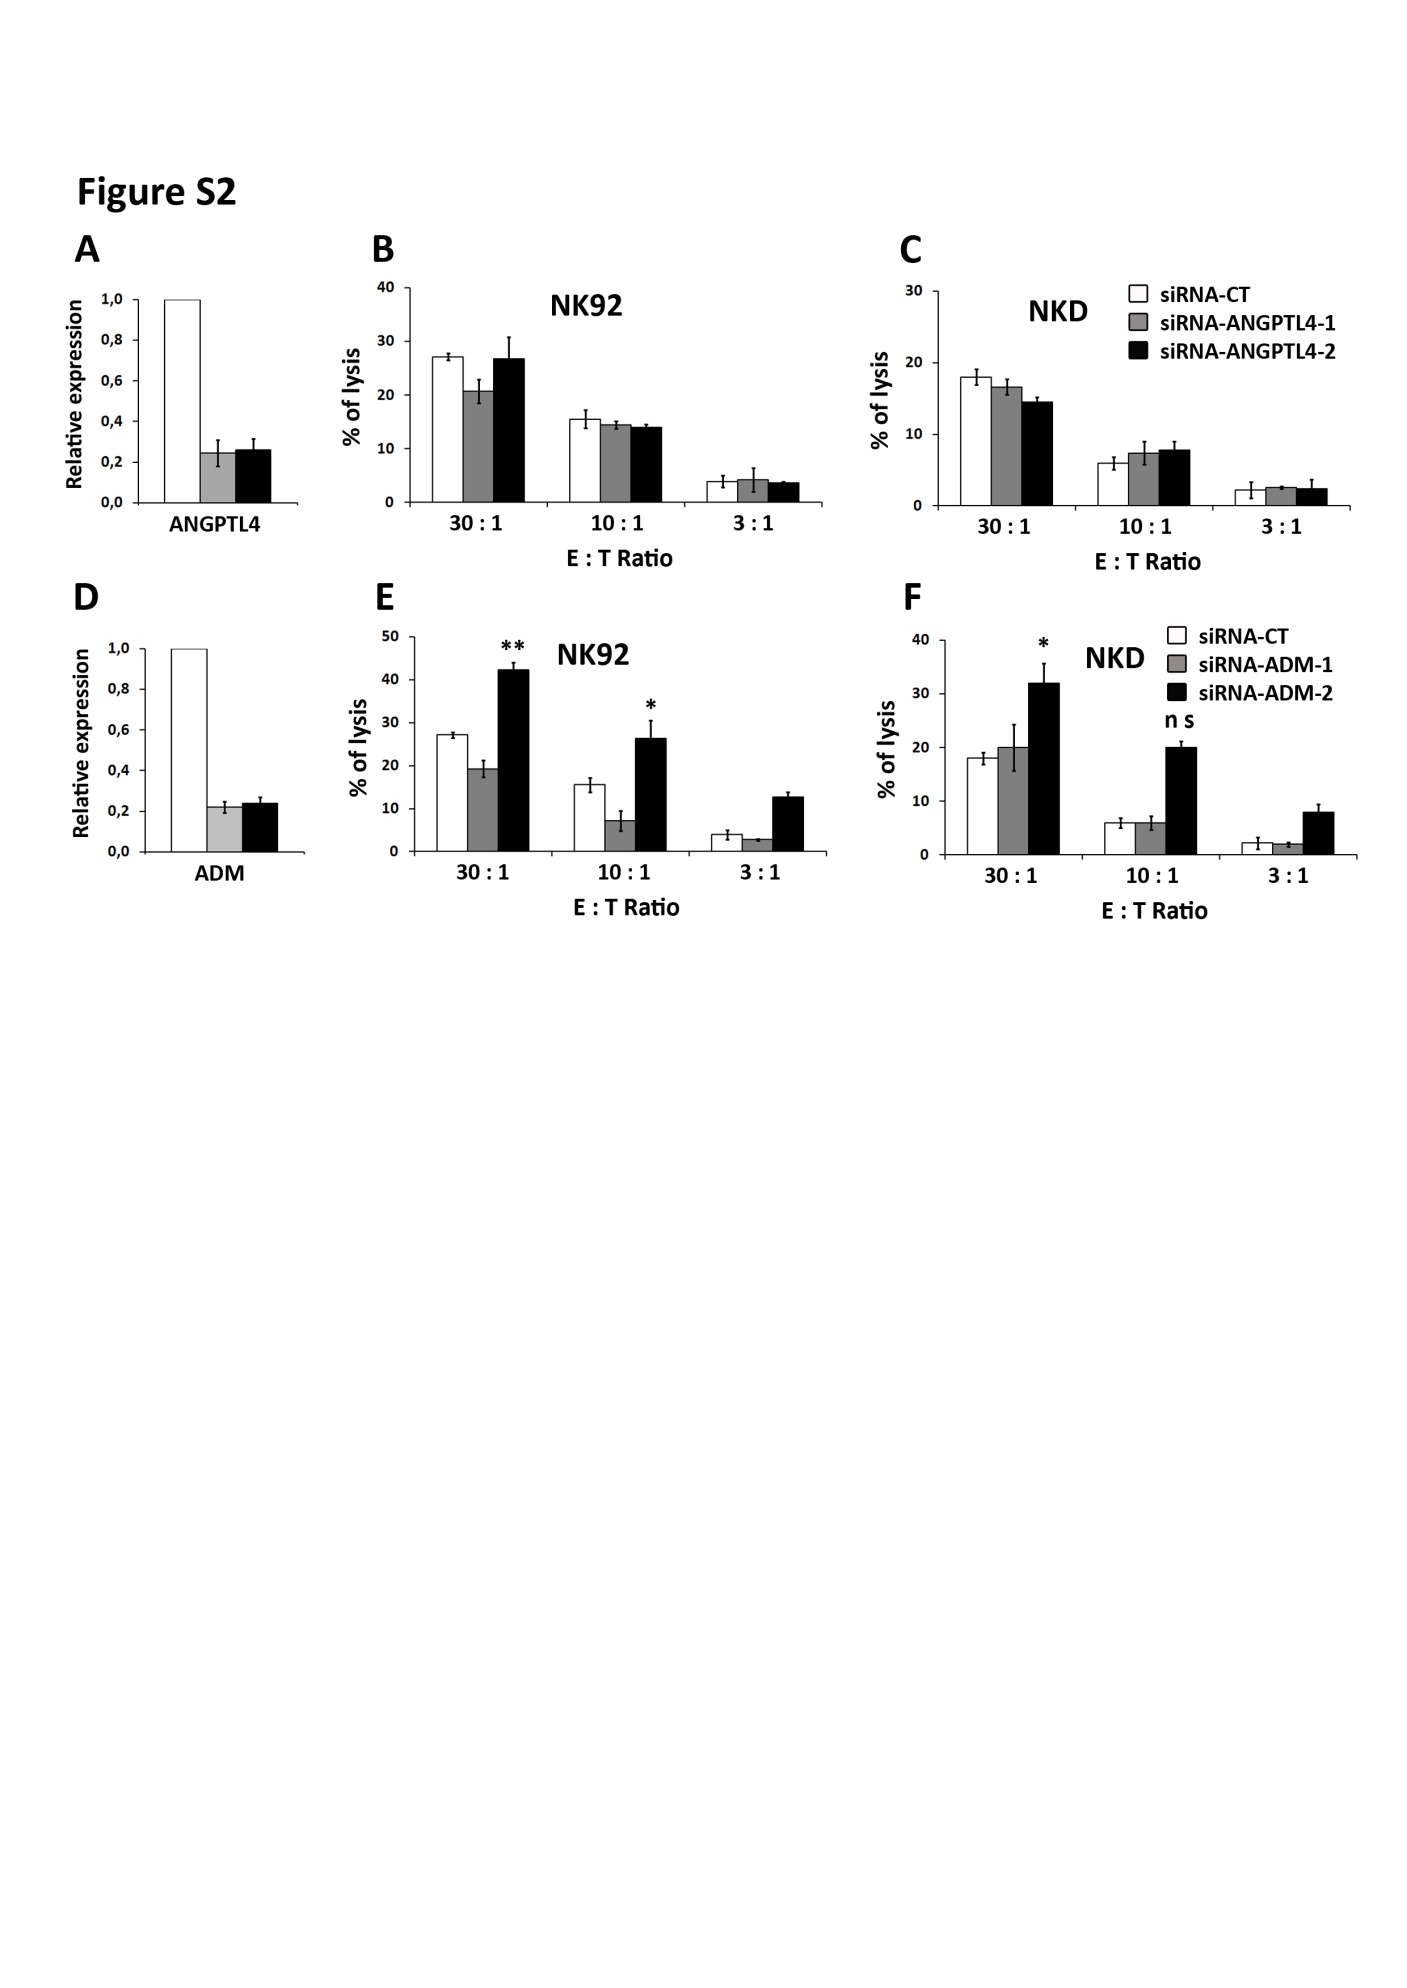
**

**Figure S2.** **Role of ANGPTL4 and ADM in RCC cell susceptibility to NK-mediated lysis.** 786-0 tumor cells were transfected with 2 different siRNA targeting either ANGPTL4 **(A)**, ADM **(D)**, or control siRNA and gene silencing was confirmed by qRT-PCR. Cr51 cytotoxicity assays were performed on 786-0 transfected with siRNA against ANGPTL4 **(B and C)**, ADM **(E and F)** or control siRNA as targets at different E: T ratios. NK 92 and NKD cells were used as effectors. Data represent 3 independent experiments with SD. Statistically significant difference (indicated by asterisks) are shown (*P < 0.05; **P < 0.005; and ***P < 0.0005).

**Figure S3**

|  | | | | | | |  |
| --- | --- | --- | --- | --- | --- | --- | --- |
|  |  | | | |  | | |
| **786-O** | | **PRC3** | | **WT7** | | |
|  | **MFI** | **%** | **MFI** | **%** | **MFI** | **%** | |
| **CD 112** | **2633** | **99.6** | **3720** | **99.7** | **4471** | **99.8** | |
| **CD 150** | **12646** | **100** | **21724** | **100** | **21193** | **100** | |
| **MIC A/B** | **1201** | **91,5** | **1644** | **96,7** | **973** | **89,9** | |
| **ULBP 1** | **288** | **6,5** | **366** | **15,7** | **314** | **5,7** | |
| **ULBP 2** | **1297** | **90** | **1142** | **86,5** | **1833** | **98,8** | |
| **ULBP 3** | **761** | **71,3** | **603** | **49** | **827** | **81** | |
| **HLA ABC** | **12417** | **100** | **10824** | **100** | **13877** | **100** | |
| **HLA E** | **276** | **5** | **196** | **1,5** | **312** | **5,1** | |
| **HLA G** | **156** | **0,8** | **149** | **0,9** | **169** | **1,4** | |
|  |  |  |  |  |  |  | |

**Figure S3. VHL and NK ligand expression in RCC cells.**

Analysis of surface expression of NK ligands in 786-0, PRC3 and WT7 cell lines. Isotypic control mAb (IgG) was used.

**Figure S4**

|  |  | | | |  | |  | |
| --- | --- | --- | --- | --- | --- | --- | --- | --- |
| **786-O** | | **SiRNA-CT** | | **SiRNA-HIF-2α 1** | | **SiRNA-HIF-2α 2** | |
|  | **MFI** | **%** | **MFI** | **%** | **MFI** | **%** | **MFI** | **%** |
| **CD 112** | **1806** | **94.3** | **1758** | **100** | **2041** | **100** | **1723** | **99.4** |
| **CD 150** | **12092** | **100** | **10475** | **100** | **11877** | **100** | **13887** | **100** |
| **MIC A/B** | **1663** | **100** | **1532** | **100** | **1721** | **99.9** | **1745** | **99.9** |
| **ULBP 1** | **206** | **25.7** | **226** | **24.4** | **204** | **21.5** | **202** | **17.8** |
| **ULBP 2** | **1988** | **99.9** | **1774** | **99.9** | **2004** | **99.8** | **2067** | **99.9** |
| **ULBP 3** | **789** | **99.4** | **1100** | **100** | **1068** | **96.7** | **1188** | **99.9** |
| **HLA ABC** | **12750** | **100** | **17757** | **100** | **21389** | **100** | **16680** | **100** |
| **HLA E** | **213** | **14.2** | **179** | **12** | **168** | **12.1** | **187** | **14.1** |
| **HLA G** | **98** | **0.3** | **86** | **0.3** | **118** | **0.9** | **106** | **0.6** |
|  |  |  |  |  |  |  |  |  |

**Figure S4. Silencing of HIF-2α and NK ligand expression in 786-0 cells.**

Analysis of surface expression of NK ligands in 786-0 cells transfected with siRNA targeting HIF-2α. Isotypic control mAb (IgG) was used.


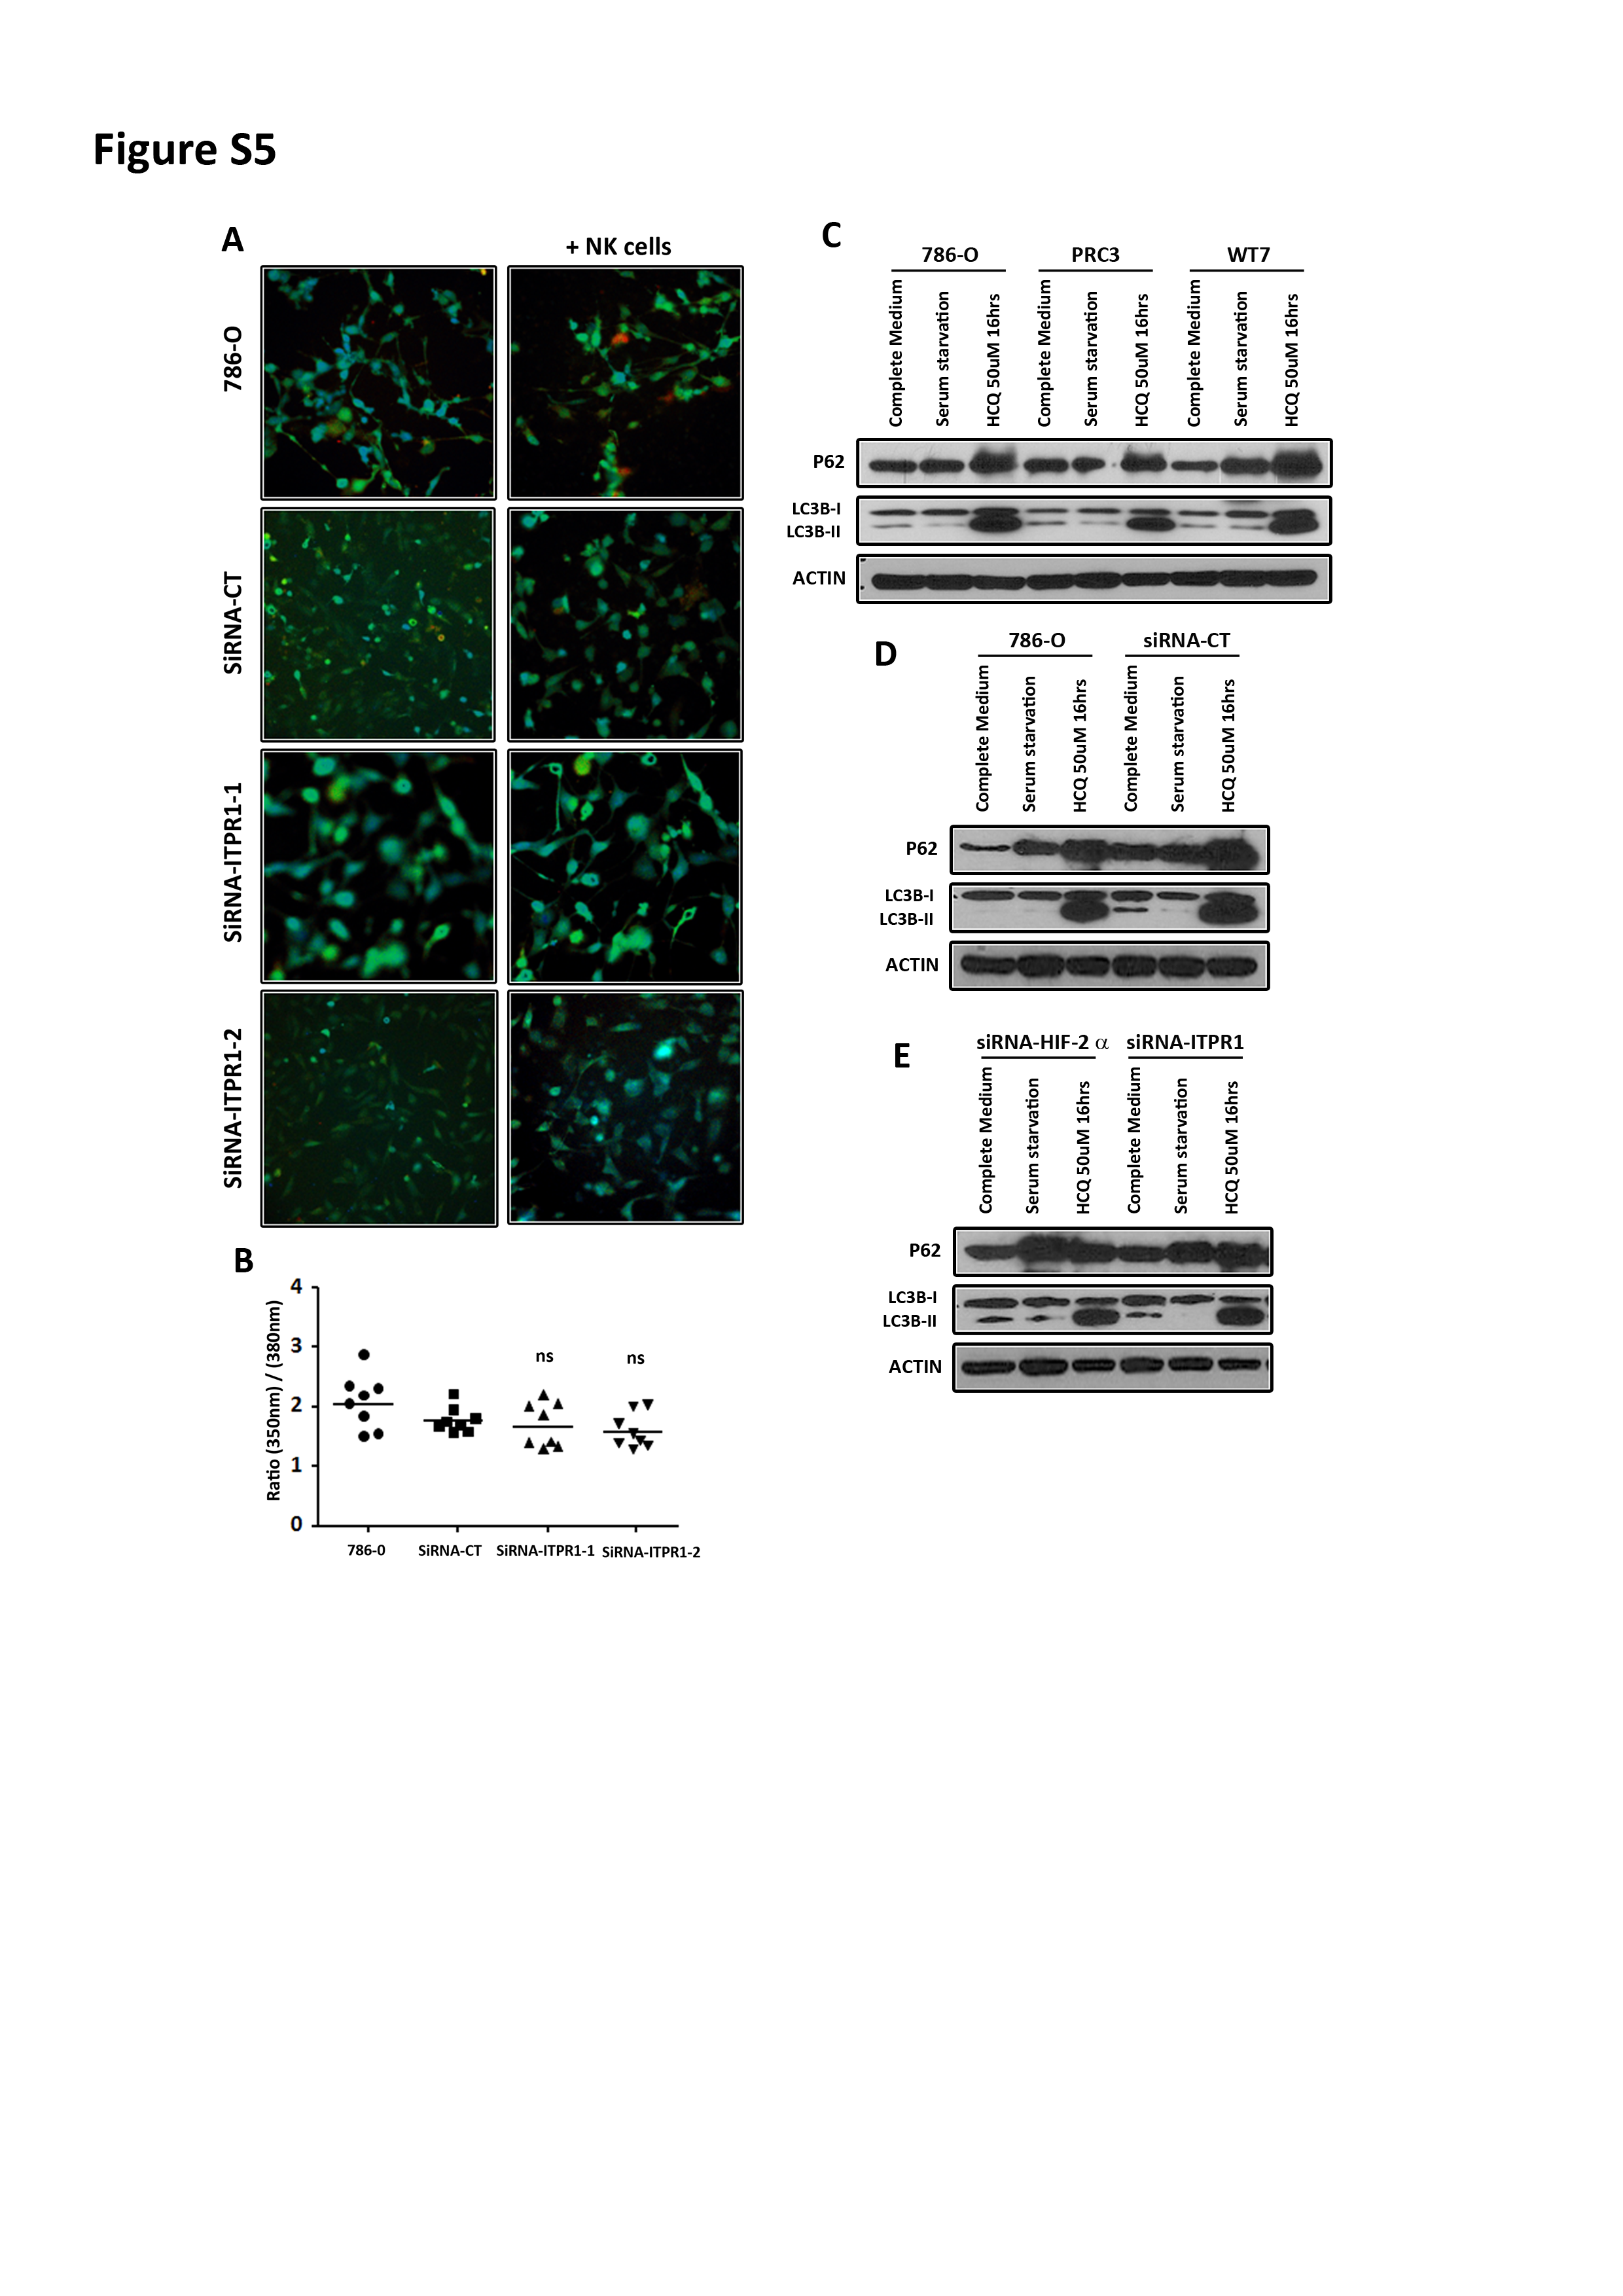


**Figure S5.** **VHL status, targeting of HIF-2α or silencing of ITPR1 does not regulate autophagy in 786-0 cells. (A)**. **Ca2+ response of ITPR1 targeted tumor cells in presence and absence NK effectors. (B)** All tumor cells loaded with the Ca2+sensitive fluorescent dye Fura-2 were monitored alone ( left panels) or with NK cells (right panels). The video imaging was performed during 10 minutes with an image acquisition every 10s. Images are representative of Ca2+ response at t = 240 s. Quantification of intracellular Ca2+was made by MetaFluor Analyst Software for each condition at the same time lapses (240 s), statistics were analyzed were calculated using GraphPad Prism software **(B)**. In these experimental conditions, each symbol correspond to an average of Ca2+ response for a group of 10 tumor cells at the same time lapses (240 s). Statistics were analyzed using GraphPad Prism software (NS: non significant) Scale bar corresponding to 100µm. Autophagy was evaluated by western blot using anti-LC3B and anti-p62 antibodies. **(C)** 786-0, PRC3, WT7 cells were serum starved or treated with Hydroxychloroquine (HCQ, 50 M) for 16h. 786-0 cells were transfected either with control siRNA **(D, E)**, HIF-2 siRNA, or ITPR1 siRNA.
